# Supplementary material for: Comparative Study of Essential Oils from Tunisian Pinus Halepensis Mill. by Hydrodistillation and Microwave-Assisted Processes: Chemical Composition and Antioxidant and Cytotoxic Potential against Prostate and Cervical Cancer Cells
Source: PubMed Central journal article supplement — ACS Omega. 2024 Jul 24;9(31):34128–39. doi: 10.1021/acsomega.4c05123 (PMC11308029; doi:10.1021/acsomega.4c05123), 2024-07-24
Supplement: ao4c05123_si_001.pdf [file ao4c05123_si_001.pdf]

# Comparative study of essential oils from Tunisian *Pinus halepensis* Mill. By Hydro-Distillation and Microwave-Assisted Processes: Chemical composition, Antioxidant and cytotoxic potential against prostate and cervical cancer cells

Eya Hamzaoui,<sup>1</sup> Oumayma B.Y. Zallez,<sup>1</sup> Julio Buñay,<sup>2</sup> Martin Lereboure,<sup>3</sup> Hayfa Argui,<sup>1</sup> Silvère Baron,<sup>2</sup> Hechmi Said,<sup>1</sup> Jean-Marc A. Lobaccaro,<sup>2</sup> and Samah Akriche\*,<sup>1</sup>

<sup>1</sup> Laboratory of Chemical Materials LR13ES08, Faculty of Sciences of Bizerte, Carthage University, 7021 Zarzouna, Bizerte, Tunisia.

<sup>2</sup> Laboratoire Génétique, Reproduction and Développement, UMR CNRS 6293, INSERM U1103, Université Clermont Auvergne, F-63001, Clermont-Ferrand, France.

<sup>3</sup> Université Clermont Auvergne, Clermont Auvergne INP, CNRS, ICCF, F-63000 Clermont-Ferrand, France.

**Table S1. Effect of *P. halepensis* Mill EO extracted by MAE treatment on cell cycle in cancer for 48h.**

|       | LNCaP            |              | PC3              |              | HeLa               |              |
|-------|------------------|--------------|------------------|--------------|--------------------|--------------|
|       | Control          | MEA          | Control          | MEA          | Control            | MEA          |
| G0-G1 | 58.672±2.926**   | 69.607±4.414 | 29.589±1.876**** | 49.343±2.875 | 19.551±10.043***   | 58.929±8.873 |
| G2-M  | 39.978±2.216**** | 21.492±4.290 | 63.428±5.514**** | 42.409±3.294 | 79.837 ± 9.705**** | 38.382±9.622 |
| S     | 0.855 ± 0.535*   | 8.788± 0.436 | 0.799±0.303      | 2.713±2.197  | 0.393 ± 0.224      | 2.512 ±1.615 |

*Data is shown as the mean ± SD, N = three independent experiments, \* p < 0.05, \*\* p < 0.01, \*\*\* p < 0.001, \*\*\*\* p < 0.0001 versus control group*
